# Supplementary material
Source: PubMed Central journal article supplement (PMC8353242)
Supplement: mmc1.pdf [file mmc1.pdf]

## **Supplemental Information**

### **Plant-derived exosomal microRNAs**

**inhibit lung inflammation induced**

**by exosomes SARS-CoV-2 Nsp12**

**Yun Teng, Fangyi Xu, Xiangcheng Zhang, Jingyao Mu, Mohammed Sayed, Xin Hu, Chao Lei, Mukesh Sriwastva, Anil Kumar, Kumaran Sundaram, Lifeng Zhang, Juw Won Park, Shao-yu Chen, Shuangqin Zhang, Jun Yan, Michael L. Merchant, Xiang Zhang, Craig J. McClain, Jennifer K. Wolfe, Robert S. Adcock, Donghoon Chung, Kenneth E. Palmer, and Huang-Ge Zhang**

1 **Supplementary Data**

2 **Figure S1. Lung epithelial cells release exosomes containing the proteins of SARS-**  
3 **CoV-2.**

4 (A) A549 cells transfected with pcDNA3-CoV-2-S-GFP. Visualization with confocal  
5 fluorescent microscopy; Scale bars, 20  $\mu\text{m}$ . (B) Analysis of dot blot with anti-GFP antibody.  
6 (C) U937 cells treated with exosomes from A549 cells and cytokine analysis in the medium  
7 with ELISA. Data are representative of three independent experiments (error bars, SD).

8

9 **Figure S2. Distribution of lung epithelial cell-released exosomes following intratracheal**  
10 **administration in mice.**

11 (A) A representative fluorescent image of brain, lung, heart, liver, kidney, small intestine  
12 and large intestine from C57BL/6 mice receiving a single intratracheal administration of 10 mg  
13 DiR dye-labelled LLC1-derived exosome at 0 h, 1 h and 2 h (**left panel**); Image of serum after  
14 intratracheal administration (**right panel**). (B, C) Representative immunofluorescence in the  
15 lung from C57BL/6 mice receiving a single intratracheal administration of 10 mg PKH26-  
16 labelled LLC1-derived exosome at 24 h. Visualization of F4/80<sup>+</sup>, Gr-1<sup>+</sup> (B) and CD-11b<sup>+</sup> (C)  
17 cells by confocal microscopy. Arrows in yellow indicated exosome/PKH26 taken up by F4/80<sup>+</sup>  
18 or Gr-1<sup>+</sup> cells; Scale bars, 20  $\mu\text{m}$ . (D) ELISA analysis of TNF $\alpha$ , IL-1 $\beta$  and IL-6 in lung from  
19 C57BL/6 mice three days after inoculation of Vero E2 cells-derived exosomes containing  
20 Nsp12, Nsp13, or Nsp12/13 through intratracheal administration. (E) ELISA analysis of TNF $\alpha$ ,  
21 IL-1 $\beta$  and IL-6 in serum from C57BL/6 mice three days after inoculation of LLC1-derived  
22 exosome containing Nsp12, Nsp13, or Nsp12/13 through intratracheal administration. (F)  
23 Exosomes from primary lung epithelial cells transfected with Nsp12 and Nsp13 plasmids

24 and administrated to mice via intratracheal injection. ELISA analysis of TNF $\alpha$ , IL-1 $\beta$  and IL-  
25 6 in lung. Data are representative of three independent experiments (error bars, SD). \* $p$   
26 <0.05 and \*\* $p$  < 0.01 (two-tailed t-test).

27

28 **Figure S3. Nsp12/13 activate cytokines mediated by the NF $\kappa$ B pathway.**

29 (A) Western blot analysis of the phosphorylation of MAPK (p38), ERK 1/2 (p44/42) and PI3K  
30 in lung macrophages of C57BL/6 mice (n=5) after intratracheal inoculation with exosomes  
31 from LLC1 cells transfected with Nsp12 and/or Nsp13 as well as aly-miR396a-5p. Data are  
32 representative of three independent experiments. (B) Pretreatment with p-I $\kappa$ B $\alpha$  inhibitor (Bay  
33 11-7821, 10 mg/kg/d, body weight) (n=5) by intraperitoneal injection 3 days following  
34 intratracheal administration of exosomes. ELISA analysis of TNF $\alpha$  and IL-6 in lung  
35 macrophages. (C) Representative immunofluorescence in lung from C57BL/6 mice receiving  
36 Bay 11-7821 (10 mg/kg/d, body weight) (n=5) by intraperitoneal injection 3 days following a  
37 single intratracheal administration of 10 mg of exosomes with Nsp12/13 per day for three  
38 consecutive days. Visualization of TUNEL-GFP $^{+}$  and EpCAM $^{+}$  cells by confocal microscopy.  
39 Arrows in yellow indicated TUNEL $^{+}$ EpCAM $^{+}$  cells; Scale bars, 20  $\mu$ m. (D) The  
40 exosome $^{Nsp12/13}$  and exosome $^{Nsp12/13+miR396a-5p}$  from LLC1 cells intratracheally injected into  
41 mice. The apoptotic bodies (ABs) were isolated from lung epithelial cells and quantified with  
42 FACS using forward scatter (FSC) and Annexin V-FITC staining. (E) ELISA analysis of  
43 cytokines in the lung of mice intratracheally injected with ABs at  $1 \times 10^8$ . Data are  
44 representative of three independent experiments (error bars, SD). \* $p$  < 0.05 and \*\* $p$  < 0.01  
45 (two-tailed t-test).

46

47 **Figure S4. Purification and characterization of ginger-derived nanovesicles (GNVs).**

48 (A) Sucrose-banded particles GELNs from ginger juice. The GELNs were isolated from  
49 ginger juice using a sucrose gradient (8, 30, 45, and 60% sucrose in 20 mM Tri-Cl, pH 7.2).  
50 Particles from the band between 8% and 30% sucrose were used for preparation of  
51 nanoparticles. (B) GNVs generated with the lipids extracted from GELNs. Size distribution  
52 of GNVs using a NanoSight NS300 (Westborough, MA) with a flow speed at 0.03 mL per min.  
53 (C) Quantification of GNV yield ( $n = 3$ ) by weight of lipid from the GELN. Data are  
54 representative of three independent experiments (error bars, SD). (D) A representative  
55 electron microscopy image of GNVs. Scale bars, 200 nm. (E) A representative fluorescence  
56 image of lung (left panel) and small intestine (right panel) from C57BL/6 mice receiving a  
57 single intratracheal administration of 10 mg DiR dye-labelled GNVs at 0 h, 1 h, 12 h, 24 h and  
58 72 h; Image of serum after intratracheal administration (right panel).  $n = 5$  per group. Data are  
59 representative of three independent experiments (error bars, SD).

60

61 **Figure S5. GNVs reduce the induction of cytokines activated by LPS in lung.**

62 (A) Representative immunofluorescence in lung from C57BL/6 mice receiving a single  
63 intratracheal administration of 10 mg PKH26- labelled GNVs at 24 h. Visualization of F4/80<sup>+</sup>  
64 and EpCAM<sup>+</sup> cells by confocal microscopy. Arrows in yellow indicated GNVs/PKH26 taken  
65 up by F4/80<sup>+</sup> or EpCAM cells; Scale bars, 20  $\mu$ m. (B) ELISA analysis of cytokines in lung  
66 from C57BL/6 mice receiving a single intratracheal administration of  $1 \times 10^8$  GNVs, grapefruit-  
67 derived nanovesicles (GFNVs), gold nanoparticles (NP) and 5  $\mu$ g of LPS at 12 h. (C) GNVs  
68 generated with additional PA, PC and PE. FACS analysis of GNVs/PKH26 taken up by A549 cells  
69 (**Top panel**). Quantification of percentage of exosome/PKH26<sup>+</sup> in A549 cells (**bottom panel**).  
70 (D) ELISA analysis of cytokines in lung treated with LPS (1 mg/kg) via intra-venous and potential  
71 vesicles for therapeutic delivery by Gold nanoparticles (NP), GNVs and grapefruit nanovesicles

72 (GFNVs). (E) Serum aspartate transaminase (AST) and alanine transaminase (ALT) levels of  
73 C57BL/6 mice with various concentrations of GNVs by intratracheal administration. (F)  
74 Evaluation of A549 cell proliferation and cytotoxicity of GNVs with various concentrations  
75 indicated in the graph using a luminescence ATP monitoring system. n = 5 per group. \*p<0.05  
76 and \*\*p<0.01 (two-tailed t-test). NS: not significant. Data are representative of three  
77 independent experiments (error bars, SD).

78

79 **Figure S6. GNVs efficiently deliver miRNA to lung through intratracheal injection. (A)**  
80 10 µg of aly-miR396a-5p packed with 200 µmol GNVs using ultrasonication. The capacity of  
81 aly-miR396a-5p GELNs and GNVs using qPCR. (B) qPCR analysis of aly-miR396a-5p in A549  
82 cells transfected with aly-miR396a-5p GNV compared to RNAiMAX and PEI. (C) 10 µg of aly-  
83 miR396a-5p packed into GNVs and gold NPs following intratracheal administration of  
84 C57BL/6 mice. After 48 h, qPCR analysis of aly-miR396a-5p distribution in various parts of  
85 the lung. (D) qPCR analysis expression of Nsp12 and spike (S) protein in lung after  
86 administration of viral plasmid CoV-2-Nsp12-2xStrep and pcDNA3-CoV-2-S, as well as GNVs  
87 packing aly-miR396a-5p and rlc-miR-rL1-28 or appropriate mutant RNA, respectively by  
88 intratracheal injection. \*p<0.05 and \*\*p<0.01 (two-tailed t-test). Data are representative of  
89 three independent experiments (error bars, SD).

90

91 **Figure S7. Nsp12/13 reduce growth factors and CXCL family assessed by protein**  
92 **array.**

93 Quantification of relative intensity of the selected cytokines involving cell growth factor (A)  
94 and chemokine (C-X- C motif) ligand (CXCL) (B) shown in a cytokine array in Fig. 3E.  
95 \*p<0.05 and \*\*p<0.01 (two-tailed t-test).

96

**Figure S1**

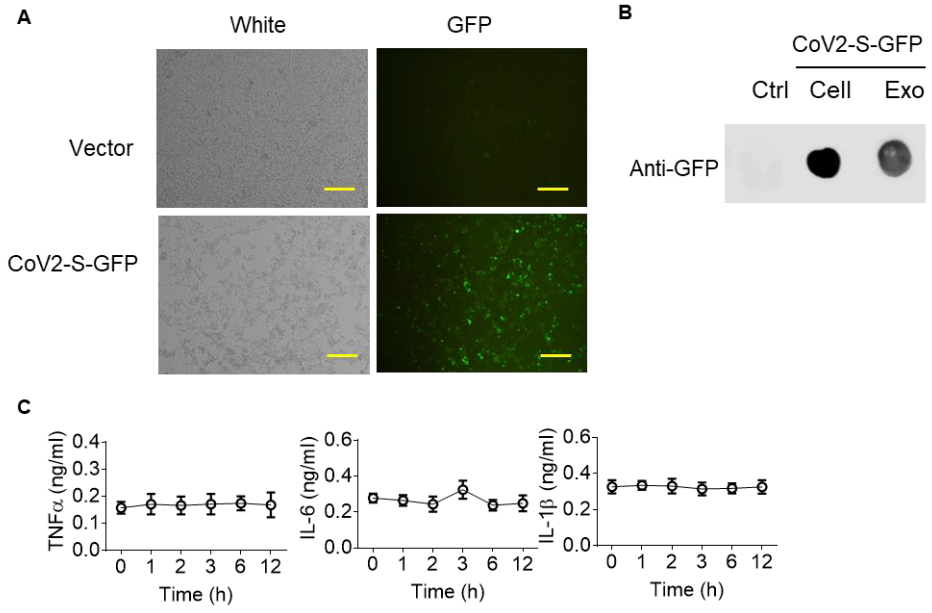

97  
98

Figure S2

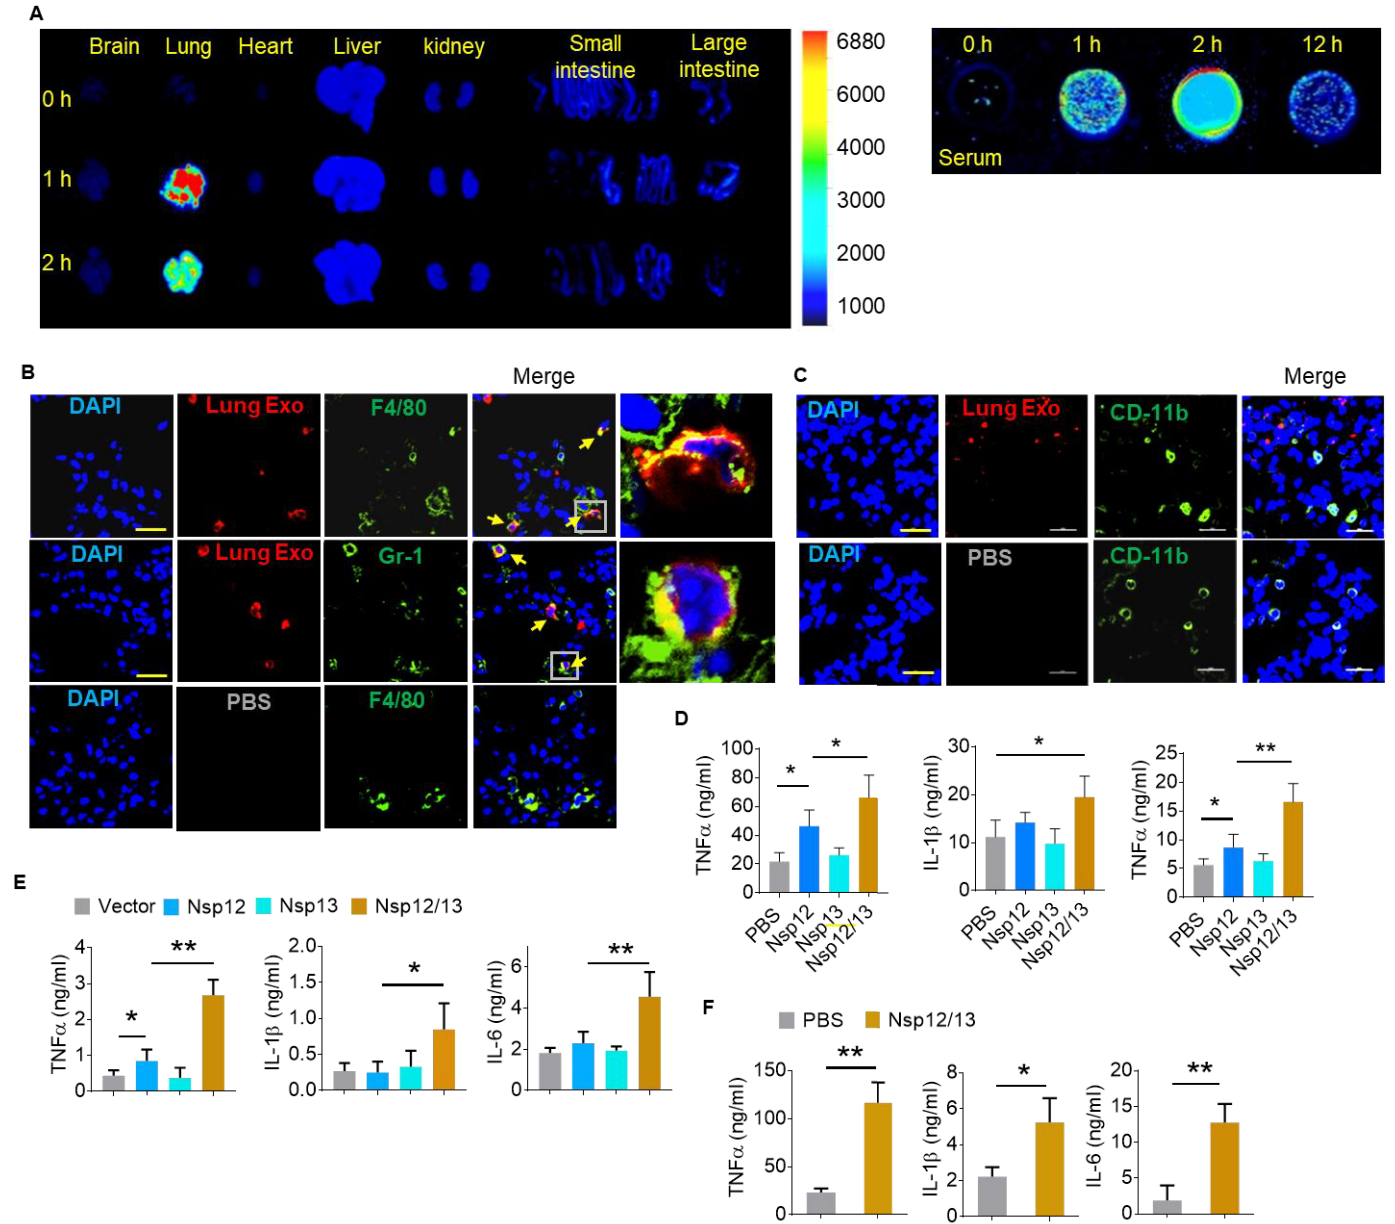

99  
100

**Figure S3**

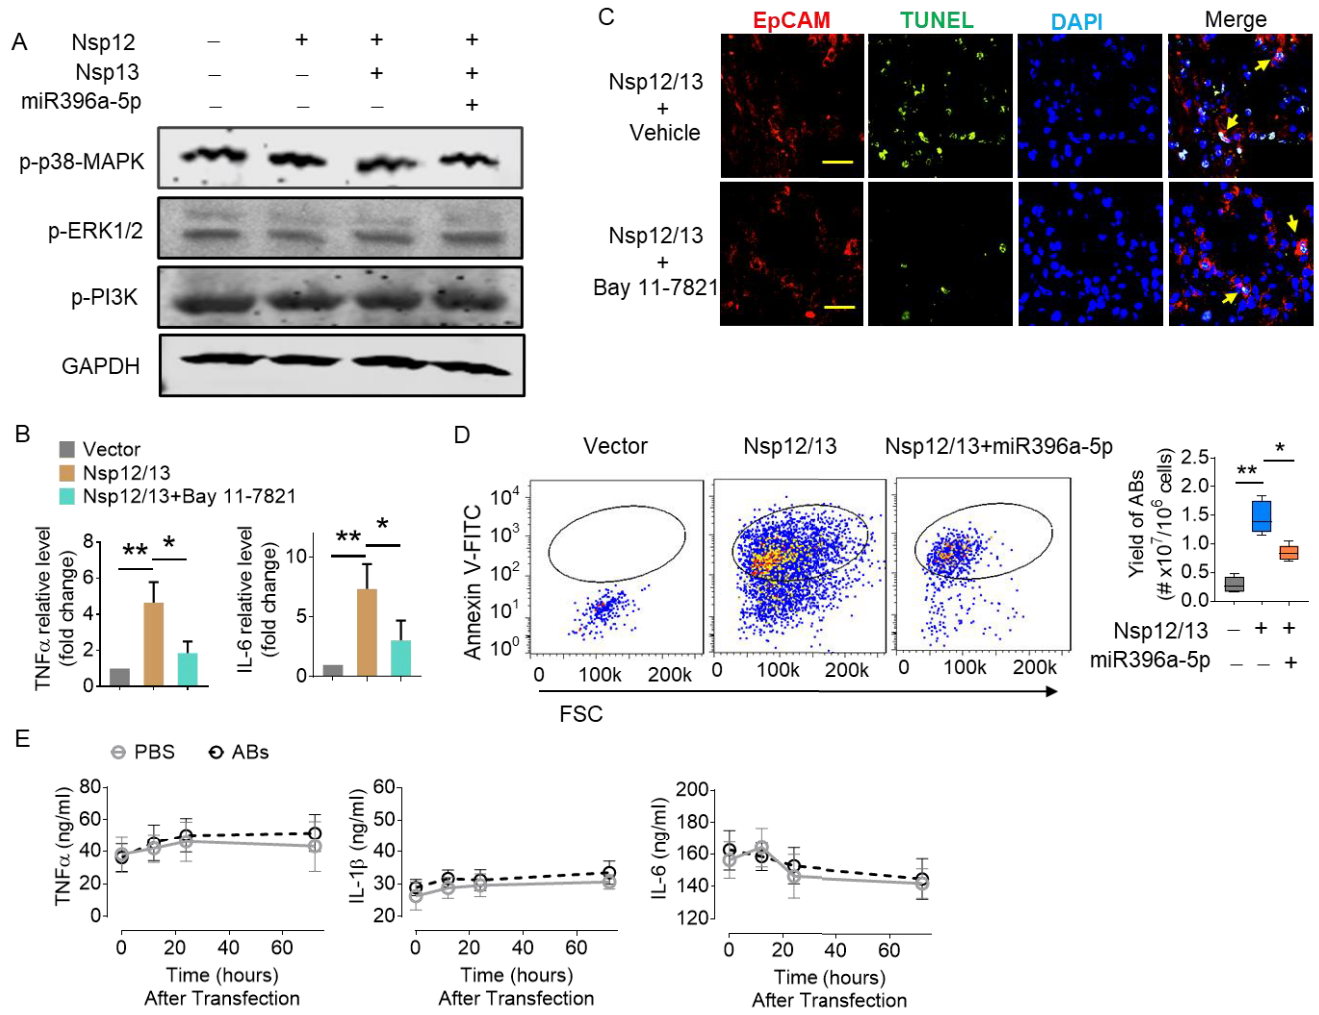

101  
102



Figure S4

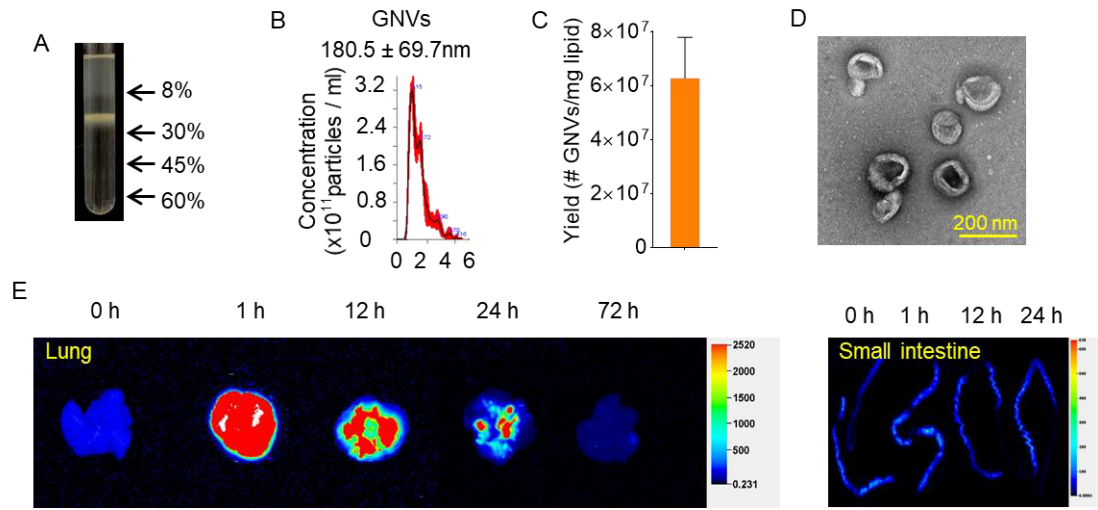

103  
104

Figure S5

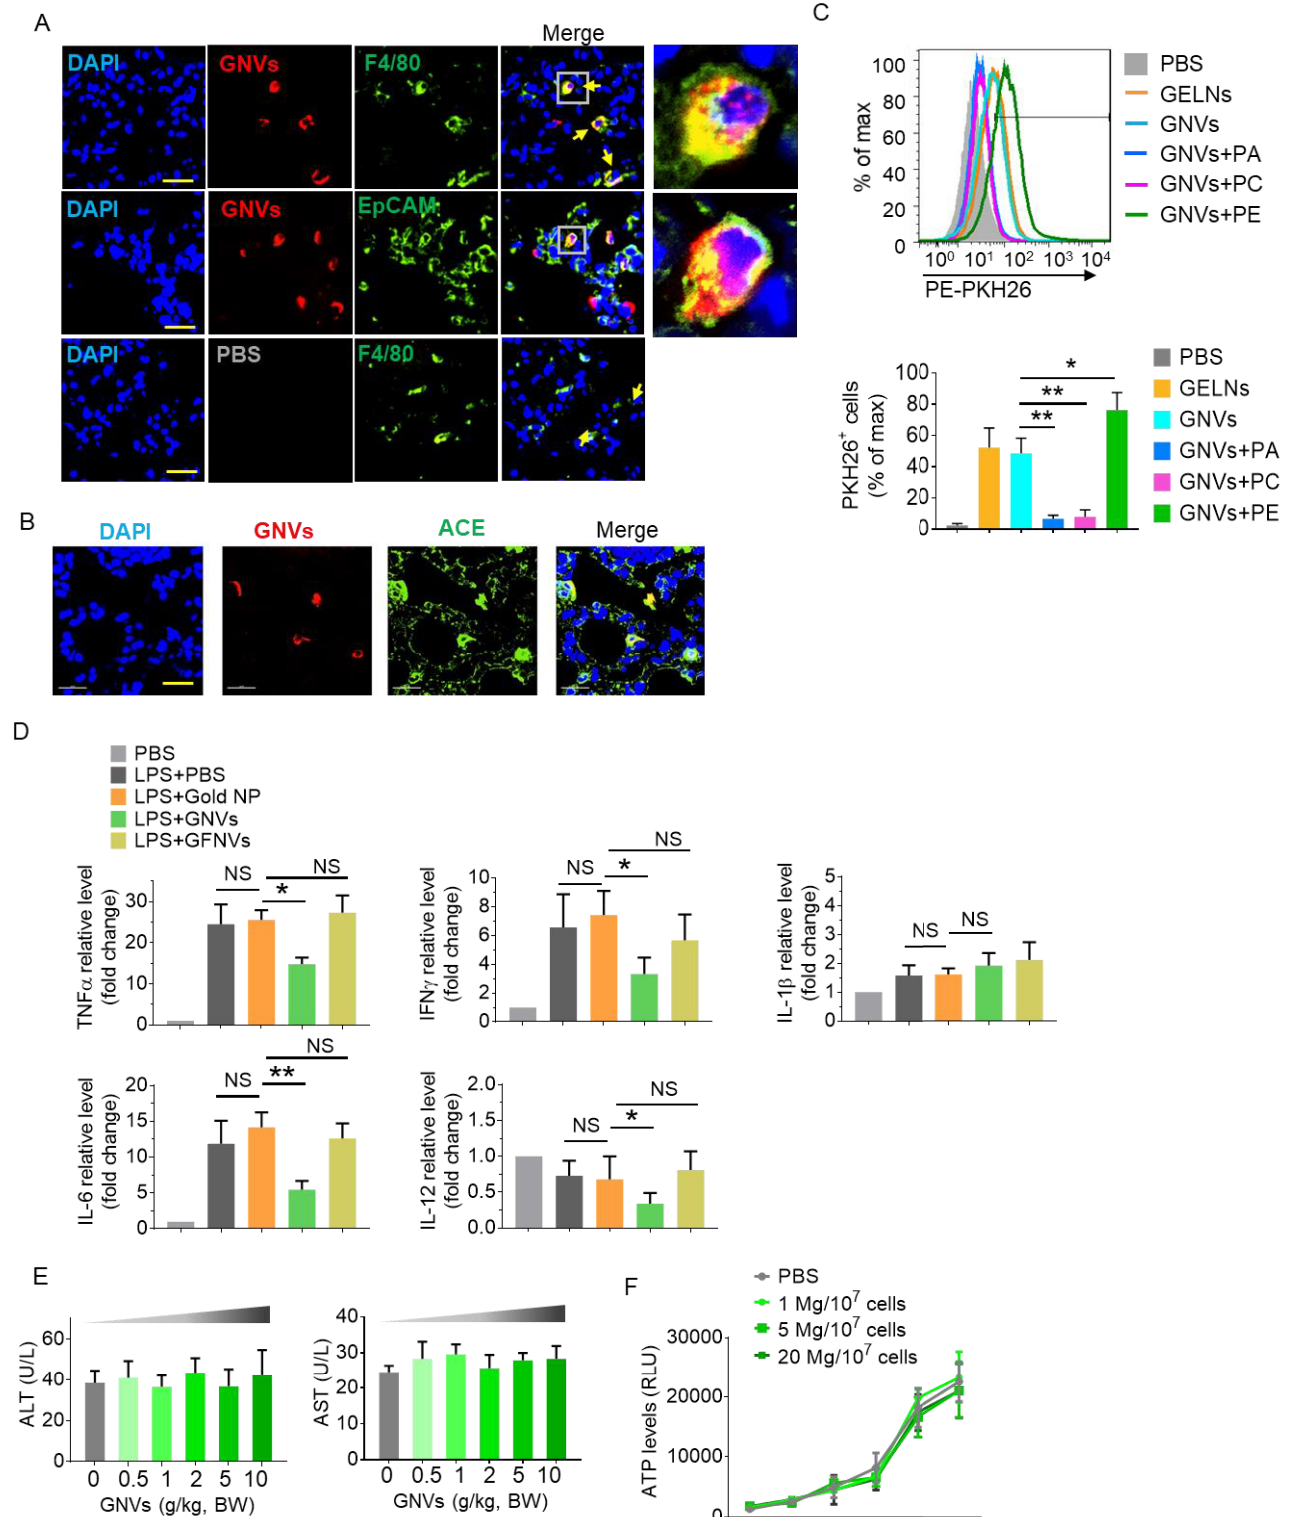

**Figure S6**

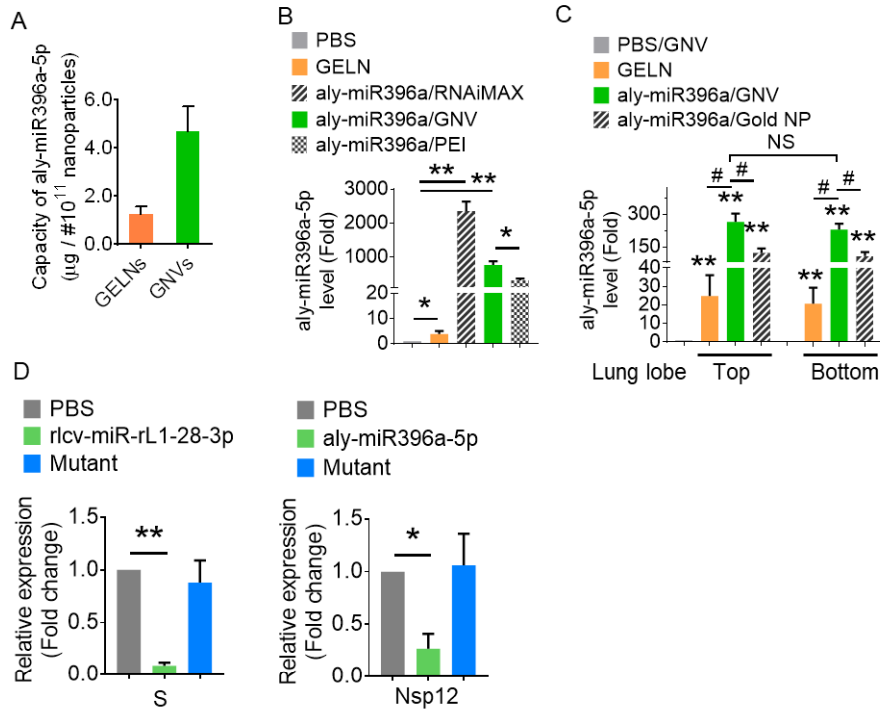

**Figure S7**

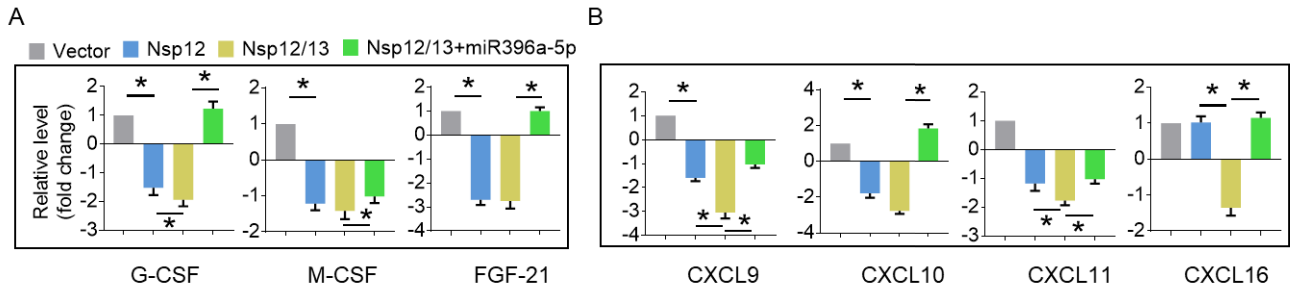

106  
107  
108

**Table S1: Plasmid of SARS-CoV-2 used in the study**

| <b>Plasmids of SARS-CoV-2</b>                     | <b>Cat. #</b> | <b>Source</b> |
|---------------------------------------------------|---------------|---------------|
| pcDNA3-SARS-CoV-2-S-sfGFP                         | 141184        | Addgene       |
| pLVX-EF1alpha-SARS-CoV-2-nsp12-2xStrep-IRES-Puro  | 141378        | Addgene       |
| pLVX-EF1alpha-2xStrep-SARS-CoV-2-orf3b-IRES-Puro  | 141384        | Addgene       |
| pLVX-EF1alpha-SARS-CoV-2-orf8-2xStrep-IRES-Puro   | 141390        | Addgene       |
| pLVX-EF1alpha-SARS-CoV-2-orf10-2xStrep-IRES-Puro  | 141394        | Addgene       |
| pTwist-EF1alpha-SARS-CoV-2-E-2xStrep              | 141385        | Addgene       |
| pLVX-EF1alpha-SARS-CoV-2-nsp7-2xStrep-IRES-Puro   | 141373        | Addgene       |
| pLVX-EF1alpha-SARS-CoV-2-nsp10-2xStrep-IRES-Puro  | 141376        | Addgene       |
| pLVX-EF1alpha-SARS-CoV-2-nsp13-2xStrep-IRES-Puro  | 141379        | Addgene       |
| Bacterial Expression plasmid for SARS-CoV-2 M     | 145746        | Addgene       |
| Bacterial Expression plasmid for SARS-CoV-2 Spike | 145730        | Addgene       |
| Bacterial Expression plasmid for SARS-CoV-2 Nsp12 | 145616        | Addgene       |
| pAcGFP1-C1                                        | 632470        | Addgene       |

**Table S2 GELN miRNAs predicted target genes of SARS-CoV2**

| Name             | Seed sequence | SARS-CoV2 (NC_045512) |      |       | Mapping to miRNAs in |       |
|------------------|---------------|-----------------------|------|-------|----------------------|-------|
|                  |               | Start                 | End  | Gene  | Human                | Mouse |
| bta-miR-2284b    | AAAGTTCGTTT   | 68                    | 78   | 5'UTR |                      |       |
| sko-miR-4825-3p  | CCTGTCAAC     | 152                   | 160  | 5'UTR |                      |       |
| aly-miR157d-5p   | CAGAAGATAGA   | 175                   | 185  | 5'UTR |                      |       |
| esi-miR8629      | TCACCACTA     | 562                   | 570  | Nsp1  |                      |       |
| aly-miR396a-5p   | TTTCTTGAA     | 735                   | 743  | Nsp1  |                      |       |
| pma-miR-22b-5p   | AGGTCTTTA     | 868                   | 876  | Nsp2  |                      |       |
| osa-miR5792      | GTTCCGACA     | 909                   | 917  | Nsp2  |                      |       |
| gma-miR1516a-5p  | AGCTCTTTT     | 1002                  | 1010 | Nsp2  |                      |       |
| ppc-miR-8335-5p  | AGGCACATT     | 1207                  | 1215 | Nsp2  |                      |       |
| bbe-miR-252b-3p  | GTCCTACTT     | 1395                  | 1403 | Nsp2  |                      |       |
| sly-miR164b-3p   | CCTTCTCCAAC   | 1580                  | 1590 | Nsp2  |                      |       |
| mtr-miR396c      | TTCAAGAAGGT   | 1611                  | 1621 | Nsp2  |                      |       |
| gga-miR-1775-5p  | TGAATGCTT     | 1755                  | 1763 | Nsp2  |                      |       |
| cel-miR-791-5p   | GTAGCCAAA     | 2032                  | 2040 | Nsp2  |                      |       |
| dps-miR-2537-5p  | CAACCGTCT     | 2194                  | 2202 | Nsp2  |                      |       |
| lva-miR-182-5p   | ATTCACACT     | 2777                  | 2785 | Nsp3  |                      |       |
| ppc-miR-240      | TCAATCCTT     | 2806                  | 2814 | Nsp3  |                      |       |
| bmo-miR-3308-5p  | TACTTTATC     | 2813                  | 2821 | Nsp3  |                      |       |
| bmo-miR-3329     | TTTATGACAG    | 2898                  | 2907 | Nsp3  |                      |       |
| gma-miR393h      | TTCCAAAGG     | 3140                  | 3148 | Nsp3  |                      |       |
| cca-miR6117      | GGTTGAAGA     | 3169                  | 3177 | Nsp3  |                      |       |
| esi-miR3455-5p   | AAGTTCCATC    | 3304                  | 3313 | Nsp3  |                      |       |
| bmo-miR-2797d    | TAAGTAGACATT  | 3779                  | 3790 | Nsp3  |                      |       |
| ppt-miR1069-5p   | TCTTATCAT     | 3948                  | 3956 | Nsp3  |                      |       |
| bmo-miR-3400     | ATTTTCTTA     | 3952                  | 3960 | Nsp3  |                      |       |
| ppe-miR6261      | TATATGGAG     | 4113                  | 4121 | Nsp3  |                      |       |
| esi-miR8629      | CCACAGCAGT    | 4154                  | 4163 | Nsp3  |                      |       |
| aly-miR858-5p    | TTGTCTGTT     | 4228                  | 4236 | Nsp3  |                      |       |
| sma-miR-8437-5p  | GTAGAATGT     | 4326                  | 4334 | Nsp3  |                      |       |
| bta-miR-2463     | CTGCATGTG     | 4404                  | 4412 | Nsp3  |                      |       |
| mdo-miR-7283-5p  | CTATGGCTT     | 4452                  | 4460 | Nsp3  |                      |       |
| gma-miR4391      | AAGAAGAAG     | 4737                  | 4745 | Nsp3  |                      |       |
| dsi-miR-961-5p   | AAGTGAGAT     | 4778                  | 4786 | Nsp3  |                      |       |
| zma-miR395l-5p   | ACTTCACCA     | 4906                  | 4914 | Nsp3  |                      |       |
| sko-miR-4825-3p  | ACACCTTAA     | 4968                  | 4976 | Nsp3  |                      |       |
| aly-miR166a-5p   | AATGTTGTCT    | 4987                  | 4996 | Nsp3  |                      |       |
| mdo-miR-7319-3p  | AAGTTGGAC     | 5049                  | 5057 | Nsp3  |                      |       |
| vvi-miR3631a-5p  | TGACATCAT     | 5681                  | 5689 | Nsp3  |                      |       |
| dps-miR-2537-5p  | ACCGTCTAT     | 5807                  | 5815 | Nsp3  |                      |       |
| ppc-miR-8274-5p  | GAGGACTTT     | 5827                  | 5835 | Nsp3  |                      |       |
| bmo-miR-3308-5p  | AATTGGTTG     | 5993                  | 6001 | Nsp3  |                      |       |
| prd-miR-7579-3p  | AGAATTTGT     | 6821                  | 6829 | Nsp3  |                      |       |
| sly-miR5302b-5p  | TGCTATAGT     | 6854                  | 6862 | Nsp3  |                      |       |
| zma-miR395l-5p   | CAAACACTT     | 6973                  | 6981 | Nsp3  |                      |       |
| dps-miR-2537-5p  | ACAACCGTCTA   | 7467                  | 7477 | Nsp3  |                      |       |
| bmo-miR-3208     | GAGAGAGAGA    | 7814                  | 7823 | Nsp3  |                      |       |
| bma-miR-5847     | ATTTTGCAG     | 7923                  | 7931 | Nsp3  |                      |       |
| cbr-miR-791      | CGCTGATTT     | 7928                  | 7936 | Nsp3  |                      |       |
| bmo-miR-2797d    | AGACATTGTC    | 8144                  | 8153 | Nsp3  |                      |       |
| mtr-miR5215      | GCTACCTGC     | 8368                  | 8376 | Nsp3  |                      |       |
| cbr-miR-7583a-5p | AATATCGTG     | 8878                  | 8886 | Nsp4  |                      |       |
| nve-miR-9468     | GTACATTGGT    | 9071                  | 9080 | Nsp4  |                      |       |
| mdo-miR-7269-5p  | TGTCAGGGCGT   | 9109                  | 9119 | Nsp4  |                      |       |
| mdo-miR-7267-3p  | AGCCATCCA     | 9135                  | 9143 | Nsp4  |                      |       |

|                    |              |       |       |        |
|--------------------|--------------|-------|-------|--------|
| bdi-miR171f        | GAACCAATA    | 9725  | 9733  | Nsp4   |
| pxy-miR-8526       | TACAACCCT    | 10095 | 10103 | Nsp5   |
| sma-miR-8437-5p    | TAGAATGTC    | 10290 | 10298 | Nsp5   |
| gma-miR167c        | TGCCAGCATGA  | 10567 | 10577 | Nsp5   |
| eca-miR-9064       | AAGGTCCAT    | 10599 | 10607 | Nsp5   |
| cca-miR6114-3p     | ACGTCCATT    | 10883 | 10891 | Nsp5   |
| bma-miR-5847       | ACCCAATA     | 11236 | 11244 | Nsp6   |
| str-miR-7880x-3p   | ATCCAACCATG  | 11259 | 11269 | Nsp6   |
| sme-miR-2160-1-3p  | TAAGAGCCCA   | 11465 | 11474 | Nsp6   |
| oan-miR-7422a-3p   | TCTGAGGCT    | 12097 | 12105 | Nsp8   |
| gga-miR-1775-5p    | GTGCAACAGGA  | 12700 | 12710 | Nsp9   |
| gma-miR6300        | GTTGTAGTA    | 12776 | 12784 | Nsp9   |
| esi-miR8629        | CCACTAGCT    | 13117 | 13125 | Nsp10  |
| bmo-miR-3308-5p    | ATTGGTTGTC   | 13128 | 13137 | Nsp10  |
| prd-miR-7911c-5p   | GATGCACCA    | 13231 | 13240 | Nsp10  |
| prd-miR-7930-3p    | TGTTGGTAG    | 13677 | 13686 | Nsp12b |
| ppc-miR-240        | CAATCCTTA    | 13710 | 13718 | Nsp12b |
| eca-miR-1911       | GCCATTGTG    | 13806 | 13814 | Nsp12b |
| gga-miR-1775-5p    | CAACAGGAA    | 14132 | 14140 | Nsp12b |
| odi-miR-1479       | AATTACCGG    | 14675 | 14684 | Nsp12b |
| prd-miR-7930-3p    | GTTGGTAGA    | 14817 | 14825 | Nsp12b |
| cbr-miR-791        | GCTGATTTG    | 14937 | 14945 | Nsp12b |
| aly-miR157a-5p     | AGATAGAGA    | 15119 | 15127 | Nsp12b |
| bmo-miR-3329       | CAATAATTT    | 15160 | 15168 | Nsp12b |
| ath-miR4228-3p     | GAAACGGTG    | 15388 | 15396 | Nsp12b |
| crm-miR-7582       | GGCAATTTT    | 15580 | 15589 | Nsp12b |
| hma-miR-3013       | CTATAGAGA    | 15630 | 15638 | Nsp12b |
| aly-miR396a-5p     | AGCTTTCTT    | 16104 | 16112 | Nsp12b |
| gma-miR4391        | GCAAAGAAC    | 16252 | 16260 | Nsp13  |
| bmo-miR-3329       | TAATTTATG    | 16351 | 16359 | Nsp13  |
| dsi-miR-2583-5p    | AAAGTTGAGTC  | 16416 | 16426 | Nsp13  |
| bmo-miR-3329       | TACAATAAT    | 16445 | 16453 | Nsp13  |
| eca-miR-9004       | GTGTTAGCT    | 16602 | 16610 | Nsp13  |
| dme-miR-4980-3p    | CCAACCTCC    | 16737 | 16745 | Nsp13  |
| bmo-miR-281-5p     | AGAGAGCTA    | 17120 | 17128 | Nsp13  |
| prd-miR-7579-3p    | AATTTGTGG    | 17372 | 17380 | Nsp13  |
| aly-miR168a-5p     | TGGTGCAGGT   | 17451 | 17460 | Nsp13  |
| ath-miR5653        | TTGAGTTGG    | 17821 | 17829 | Nsp13  |
| stu-miR156f-5p     | AGAGTGAGC    | 17893 | 17901 | Nsp13  |
| dme-miR-4969-5p    | GGTAAATTG    | 18348 | 18356 | Nsp14  |
| osa-miR5792        | GCGGTGGTT    | 18455 | 18463 | Nsp14  |
| bdi-miR7738-3p     | ACGACTCTG    | 18576 | 18584 | Nsp14  |
| cbr-miR-35g        | AACTGGTA     | 19685 | 19693 | Nsp15  |
| eca-miR-9004       | ACAGTGTTA    | 19704 | 19712 | Nsp15  |
| ptc-miR6478        | TCAGTTGGT    | 19950 | 19958 | Nsp15  |
| eca-miR-9064       | TTGAAGGTC    | 20734 | 20742 | Nsp16  |
| smo-miR1112-3p     | ACAAAGTCA    | 20961 | 20969 | Nsp16  |
| bmo-miR-3400       | AGTCATTTTCTT | 21080 | 21091 | Nsp16  |
| aly-miR848-5p      | CATGTCAA     | 21391 | 21399 | Nsp16  |
| mdo-miR-7319-3p    | GACTAGAGA    | 21594 | 21602 | S      |
| sme-miR-2169-5p    | TTGAAATTC    | 21956 | 21964 | S      |
| ppc-miR-8274-5p    | ACTTTCCAT    | 22019 | 22027 | S      |
| odi-miR-1479       | TTGAAATTACC  | 22112 | 22122 | S      |
| sme-miR-2169-5p    | TTTGAATT     | 22115 | 22123 | S      |
| cbn-miR-7629       | GTGATGTTA    | 22261 | 22269 | S      |
| rlcv-miR-rL1-28-3p | AGGAAAGTA    | 23027 | 23035 | S      |
| mtr-miR2678        | AAATTGTTG    | 23249 | 23257 | S      |

|                    |              |       |       |          |                                    |                                                         |
|--------------------|--------------|-------|-------|----------|------------------------------------|---------------------------------------------------------|
| prd-miR-7579-3p    | ATTTGTGGG    | 23705 | 23713 | S        |                                    |                                                         |
| nve-miR-9468       | TGTACATTG    | 23778 | 23786 | S        |                                    |                                                         |
| bdi-miR171f        | AATATCACC    | 24086 | 24095 | S        |                                    |                                                         |
| zma-miR396g-3p     | GCTGTGGAAGA  | 24377 | 24387 | S        |                                    |                                                         |
| odi-miR-1479       | CTTGAAATT    | 24478 | 24486 | S        |                                    |                                                         |
| sme-miR-2169-5p    | AACTTTGAA    | 24564 | 24572 | S        |                                    |                                                         |
| prd-miR-7884-5p    | AGGTGCTGA    | 24725 | 24733 | S        |                                    |                                                         |
| tgu-miR-7644-3p    | AAATGGCAG    | 24798 | 24806 | S        |                                    |                                                         |
| rlcv-miR-rL1-28-3p | GAGGAAAGT    | 24825 | 24834 | S        |                                    |                                                         |
| cbr-miR-7583a-5p   | AGTTGCAAA    | 25631 | 25639 | Orf3a    |                                    |                                                         |
| aly-miR157a-5p     | AAGATAGAG    | 25708 | 25716 | Orf3a    |                                    |                                                         |
| dme-miR-2535b-3p   | ACGGCATTTC   | 25785 | 25794 | Orf3a    |                                    |                                                         |
| ath-miR5653        | TGAGTTGAGT   | 26036 | 26045 | Orf3a    |                                    |                                                         |
| zma-miR395l-5p     | TTCCAAACA    | 26500 | 26508 |          |                                    |                                                         |
| gma-miR1516a-5p    | TAAGCTCTT    | 26554 | 26562 | M        |                                    |                                                         |
| ppc-miR-8274-5p    | TTCCATTGTTCA | 26573 | 26584 | M        |                                    |                                                         |
| ssa-miR-375-2-5p   | GCTGAGCCAC   | 26795 | 26804 | M        |                                    |                                                         |
| dme-miR-4969-5p    | ATTGAATGA    | 26853 | 26861 | M        |                                    |                                                         |
| mdo-miR-7319-3p    | AGATGGTGT    | 26981 | 26989 | M        |                                    |                                                         |
| mdo-miR-7345-5p    | GTAGCGACTGT  | 27109 | 27119 | M        |                                    |                                                         |
| sme-miR-2160-1-3p  | TTTTCATGT    | 27392 | 27400 | Orf7a    |                                    |                                                         |
| ptc-miR396g-5p     | TTCTTGAACCT  | 27668 | 27678 | Orf7a    |                                    |                                                         |
| ppt-miR319a        | CTTGGACTGA   | 28584 | 28593 | N (Orf9) |                                    |                                                         |
| gma-miR396e        | CTTGAACCTG   | 28849 | 28857 | N (Orf9) |                                    |                                                         |
| eca-miR-1911       | CCAGCCATT    | 28900 | 28908 | N (Orf9) |                                    |                                                         |
| mdo-miR-7269-5p    | AATCTGTCA    | 28945 | 28953 | N (Orf9) |                                    |                                                         |
| eca-miR-9004       | AGTGACAGT    | 29006 | 29014 | N (Orf9) |                                    |                                                         |
| vvi-miR3631a-5p    | TCATCCAAT    | 29287 | 29295 | N (Orf9) |                                    |                                                         |
| sme-miR-2169-5p    | CTTTGAAAT    | 29307 | 29315 | N (Orf9) |                                    |                                                         |
| vvi-miR3631a-5p    | ATCATCCAA    | 29471 | 29479 | N (Orf9) |                                    |                                                         |
| oan-miR-7422a-3p   | GGCTCTTTC    | 29711 | 29719 | 3'UTR    |                                    |                                                         |
| bta-miR-2463       | ATGTGGTGG    | 29718 | 29726 | 3'UTR    |                                    |                                                         |
| ssc-miR-9819-5p    | CTCGATCGT    | 29749 | 29757 | 3'UTR    |                                    |                                                         |
| eca-miR-9021       | TTGTTCACTGT  | 29761 | 29771 | 3'UTR    |                                    |                                                         |
|                    |              |       |       |          |                                    |                                                         |
| bmo-miR-3315       | GGGCTGTTC    | 458   | 466   | Nsp1     |                                    | mmu-miR-298-5p                                          |
| mml-miR-7181-3p    | AGGACTCAG    | 1853  | 1861  | Nsp2     | hsa-miR-3919,<br>hsa-miR-4418      | mmu-miR-6955-5p                                         |
| gma-miR4391        | CTAAGAAGA    | 2484  | 2492  | Nsp2     | hsa-miR-4659a-<br>5p, hsa-miR-     |                                                         |
| hsa-miR-6867-3p    | TCTCCCTCT    | 2491  | 2499  | Nsp2     | hsa-miR-615-3p,<br>hsa-miR-6867-3p | mmu-miR-615-3p,<br>mmu-miR-6916-3p,<br>mmu-miR-12203-3p |
|                    |              |       |       |          |                                    |                                                         |
| ath-miR5653        | TTGAGTTGA    | 3095  | 3103  | Nsp3     |                                    | mmu-miR-7230-3p                                         |
| bmo-miR-3308-5p    | CTTGGTAAT    | 3126  | 3134  | Nsp3     | hsa-miR-4705                       |                                                         |
| dsi-miR-961-5p     | TCAGTAAGT    | 3364  | 3372  | Nsp3     | hsa-miR-4797-3p                    | mmu-miR-325-5p                                          |
| eca-miR-9021       | AGAGTTGTT    | 3985  | 3993  | Nsp3     | hsa-miR-4680-3p                    |                                                         |
| sma-miR-8439-5p    | AGATAACCA    | 4726  | 4734  | Nsp3     |                                    | mmu-miR-9b-3p                                           |
| ppc-miR-8274-5p    | ATTGTTTCAT   | 5592  | 5600  | Nsp3     | hsa-miR-384                        |                                                         |
| hma-miR-3013       | TCTGACTTC    | 6349  | 6357  | Nsp3     | hsa-miR-5683                       | mmu-miR-7235-3p                                         |
| dme-miR-4980-3p    | CAACTTCCG    | 8016  | 8024  | Nsp3     |                                    | mmu-miR-8120                                            |
| ppc-miR-8274-5p    | TTTCCATTG    | 8079  | 8087  | Nsp3     |                                    | mmu-miR-6920-3p                                         |
| eca-miR-9021       | AGTTGTTCA    | 8431  | 8439  | Nsp3     | hsa-miR-582-5p                     | mmu-miR-582-5p,<br>mmu-miR-3088-5p                      |
|                    |              |       |       |          |                                    |                                                         |
| mdo-miR-7269-5p    | GTCAGGGCG    | 9110  | 9118  | Nsp4     | hsa-miR-4734                       |                                                         |
| dme-miR-4969-5p    | AAATTGAAT    | 9149  | 9157  | Nsp4     | hsa-miR-1252-5p                    |                                                         |
| cte-miR-2685-5p    | TGATCTTTC    | 9233  | 9241  | Nsp4     | hsa-miR-6856-3p                    |                                                         |

|                  |           |       |       |         |                                    |                                                        |
|------------------|-----------|-------|-------|---------|------------------------------------|--------------------------------------------------------|
| mmu-miR-5106     | TCTGTAGCT | 9938  | 9946  | Nsp4    | hsa-miR-4320,<br>hsa-miR-4420      | mmu-miR-5106                                           |
| bmo-miR-3308-5p  | TTGGTAATT | 10551 | 10559 | Nsp5    | hsa-miR-4705                       | mmu-miR-450b-5p                                        |
| bma-miR-5847     | TTTTGCAGT | 10867 | 10875 | Nsp5    |                                    |                                                        |
| sly-miR5302b-5p  | TTGGAAAGT | 10964 | 10972 | Nsp5    | hsa-miR-412-5p                     | mmu-miR-6400                                           |
| mml-miR-1323-5p  | GGCATTTTC | 11087 | 11095 | Nsp6    | hsa-miR-1323                       |                                                        |
| cfa-miR-8837     | TTCTTGCTG | 11352 | 11360 | Nsp6    |                                    | mmu-miR-374b-3p                                        |
| mml-miR-1323-5p  | CAAACTGAG | 11884 | 11893 | Nsp7    | hsa-miR-1323                       |                                                        |
| sme-miR-2f-3p    | GCCATGCTA | 12630 | 12638 | Nsp8    | hsa-miR-1269b                      | mmu-miR-876-3p                                         |
| eca-miR-9125     | AGGTGTGTC | 12917 | 12925 | Nsp9    | hsa-miR-3650                       |                                                        |
| ppt-miR1069-5p   | TTATCATTG | 13554 | 13562 | Nsp12   |                                    | mmu-miR-181b-1-3p                                      |
| bfl-miR-4875d-3p | TACAAAGTA | 13645 | 13653 | Nsp12   | hsa-miR-876-3p                     |                                                        |
| dre-miR-181c-3p  | ACAATGAAT | 14153 | 14161 | Nsp12   | hsa-miR-181b-3p                    |                                                        |
| cbn-miR-7629     | TGTGATGTT | 16344 | 16352 | Nsp13   | hsa-miR-153-5p,<br>hsa-miR-499b-5p | mmu-miR-664-5p                                         |
| mmu-miR-664-5p   | AAAATGACT | 17101 | 17109 | Nsp13   |                                    |                                                        |
| mmu-miR-7091-3p  | TGTCGTCTC | 17329 | 17338 | Nsp13   |                                    | mmu-miR-7091-3p                                        |
| gma-miR1516a-5p  | TTATAAGCT | 19116 | 19124 | Nsp14   |                                    |                                                        |
| bmo-miR-3308-5p  | TGGTAATTG | 19360 | 19368 | Nsp14   | hsa-miR-4705                       | mmu-miR-6374                                           |
| gma-miR1516a-5p  | GTTATAAGC | 19528 | 19536 | Nsp14   |                                    |                                                        |
| gma-miR396e      | TTGAACTGT | 20142 | 20150 | Nsp15   | hsa-miR-203b-3p                    | mmu-miR-203b-3p                                        |
| hsa-miR-6867-3p  | CCCTCTTTA | 21093 | 21101 | Nsp16   | hsa-miR-6867-3p                    |                                                        |
| gma-miR4391      | ACTAAGAAG | 21478 | 21486 | Nsp16   |                                    | mmu-miR-5124b                                          |
| mml-miR-1323-5p  | AACTGAGG  | 21696 | 21704 | S       | hsa-miR-1323,<br>hsa-miR-3934-5p   |                                                        |
| mmu-miR-664-5p   | GGAAAATGA | 22679 | 22687 | S       | hsa-miR-664a-5p                    | mmu-miR-664-5p<br>mmu-miR-1843b-5p,<br>mmu-miR-7090-3p |
| hma-miR-3013     | GTCTGACTT | 22779 | 22787 | S       |                                    |                                                        |
| sly-miR5302b-5p  | GTTGGAAAG | 23244 | 23252 | S       | hsa-miR-412-5p                     | mmu-miR-669g                                           |
| vvi-miR3631a-5p  | TGTTGACAT | 23526 | 23534 | S       |                                    |                                                        |
| bta-miR-200c     | AATGATGGA | 23633 | 23641 | S       | hsa-miR-200c-3p                    | mmu-miR-200c-3p                                        |
| cbr-miR-35g      | ACTGGTAGA | 23740 | 23748 | S       | hsa-miR-183-5p,<br>hsa-miR-6720-3p |                                                        |
| aly-miR858-5p    | GTTGTCTGT | 24911 | 24919 | S       | hsa-miR-410-5p,<br>hsa-miR-6868-3p | mmu-miR-410-5p                                         |
| aly-miR166a-5p   | TGTTGTCTG | 24912 | 24920 | S       | hsa-miR-6868-3p                    |                                                        |
| mmu-miR-7028-5p  | TGAGGCTTG | 25504 | 25512 | Orf3a   |                                    | mmu-miR-7028-5p                                        |
| aly-miR159a-3p   | TGGATTGAA | 26856 | 26864 | M       | hsa-miR-6839-5p                    |                                                        |
| gma-miR1516a-5p  | TCTTTTGAG | 27739 | 27747 | Orf7a   | hsa-miR-371a-3p                    | mmu-miR-5008-5p                                        |
| bmo-miR-3315     | CCTTGGGGC | 28396 | 28404 | N(Orf9) | hsa-miR-5008-5p                    |                                                        |
| cte-miR-2685-5p  | GTGATCTTT | 28700 | 28709 | N(Orf9) | hsa-miR-6856-3p,<br>hsa-miR-8066   | mmu-miR-182-5p                                         |
| lva-miR-182-5p   | TTTGGCAAT | 28771 | 28779 | N(Orf9) | hsa-miR-182-5p                     |                                                        |



**Table S3 Primer sequences used for gene expression analysis by qPCR**

| Primers            | Forward (5'-3')                              | Reverse (5'-3')                                   |
|--------------------|----------------------------------------------|---------------------------------------------------|
| aly-miR396a-5p     | TTCCACAGCTTTCTTGAAGCTG                       | Universal primer (Qiagen)                         |
| rlcv-miR-rL1-28-3p | GAGGAAAGTATCGCCTTCTAG                        | Universal primer (Qiagen)                         |
| hTNFalpha          | CTCTTCTGCCTGCTGCACTTTG                       | ATGGGCTACAGGCTTGTCACTC                            |
| hIL-1beta          | CCACAGACCTTCCAGGAGAATG                       | GTGCAGTTCAGTGATCGTACAGG                           |
| hIL-1alpha         | TGTATGTGACTGCCCAAGATGAAG                     | AGAGGAGGTTGGTCTCACTACC                            |
| hIL-6              | AGACAGCCACTCACCTCTCAG                        | TTCTGCCAGTGCCTCTTTGCTG                            |
| mTNFalpha          | TCTATGGCCCAGACCCTCAC                         | GACGGCAGAGAGGAGGTTGA                              |
| mIL-1beta          | GTGTGCCGTCTTTTCATTACACAG                     | CAGACCCTCACACTCAGATCATCT                          |
| mIL-1alpha         | ATCAGTACCTCACGGCTGCT                         | TGGGTATCTCAGGCATCTCC                              |
| mIL-6              | GAGAGGAGACTTCACAGAGGATAC                     | GTACTIONCAGAAGACCAGAGG                            |
| mGAPDH             | GGTCGGTGTGAACGGATTTG                         | GGAGTCATACTGGAACATGTAG                            |
| hGAPDH             | GTATGACAACAGCCTCAAGAT                        | GTCCTTCCACGATACCAAAG                              |
| CoV2-Nsp12         | ACCGTAGCTGGTGTCTCTAT                         | GTGCCAACCACCATAGAATTTG                            |
| CoV2-Nsp12-cloning | CAGAGAAGGAGCTCGGTACCATGGCTG<br>ATGCACAATCGTT | TATCTAGATCCGGTGGATCCTTATAAG<br>ACTGTATGCGGTGTGTAC |
| pAcGFP1-C1         | TGCTGGAGCAGGACGGAATC                         | TCTACAAATGTGGTATGGCTG                             |
